# Supplementary material for: Significant Decrease in Glycated Hemoglobin, 2h-Post-Load Glucose and High-Sensitivity C-Reactive Protein Levels in Patients with Abnormal Body Mass Index after Therapy with Manual Lymphatic Drainage
Source: MDPI journal article supplement (doi:10.3390/biomedicines10071730), 2022-07-18
Supplement: s1 [file s1]

## Supplementary Figure S1

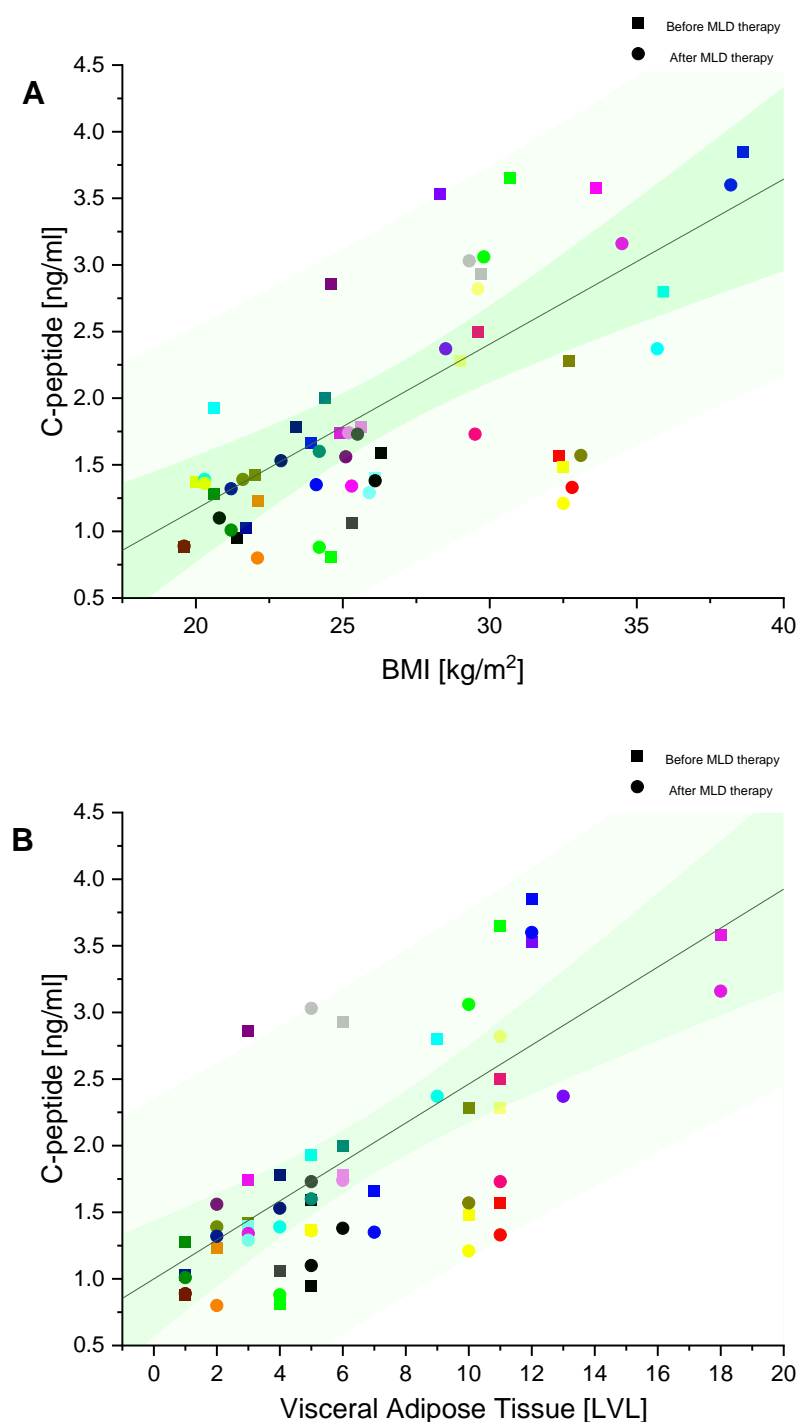

**Supplementary Figure S1, A.** Correlation between the concentration of C-peptide [ng/ml] and BMI [kg/m<sup>2</sup>] before and after MLD therapy ( $r = 0.87$ ,  $p = 0.003$ ). **Figure S1, B.** Correlation between the concentration of C-peptide [ng/mL] and the level of visceral adipose tissue before and after MLD therapy ( $r = 0.76$ ,  $p = 0.003$ ). A circle and a square in the same color indicate the parameters of one patient •, the concentration before MLD therapy; ▪, the concentration after MLD therapy. Abbreviations: BMI, body mass index; MLD, manual lymphatic drainage.

## Supplementary Figure S2

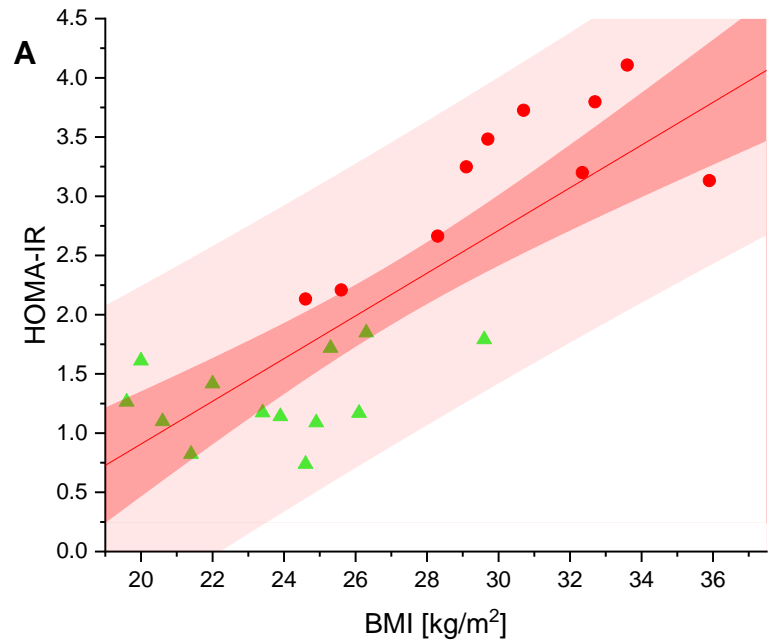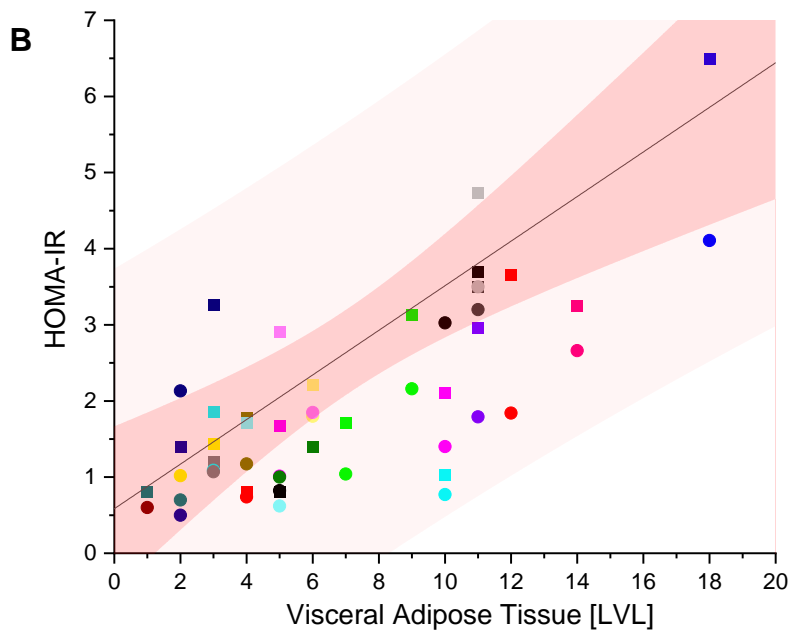

**Supplementary Figure S2, A.** Correlation between the level of HOMA-IR and BMI [kg/m<sup>2</sup>] ( $r = 0.86$ ,  $p = 0.005$ ). A circle and a triangle indicate the level of HOMA-IR below, equal or above to 2.0 of each patient,  $\blacktriangle$  the level of HOMA-IR below or equal 2.0;  $\bullet$  the level of HOMA-IR above 2.0.

**Figure S2, B.** Correlation between the level of HOMA-IR and visceral adipose tissue level ( $r = 0.84$ ,  $p = 0.042$ ). A circle and a square in the same color indicate the parameters of one patient  $\bullet$ , the concentration before MLD therapy;  $\blacksquare$ , the concentration after MLD therapy. Abbreviations: BMI, body mass index; MLD, manual lymphatic drainage; HOMA-IR, Homeostatic Model Assessment–Insulin Resistance.

## Supplementary Figure S3

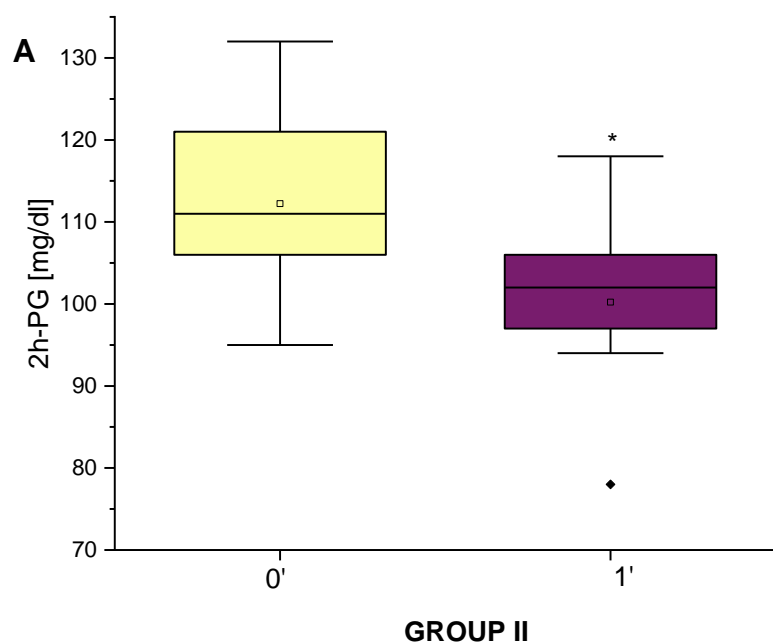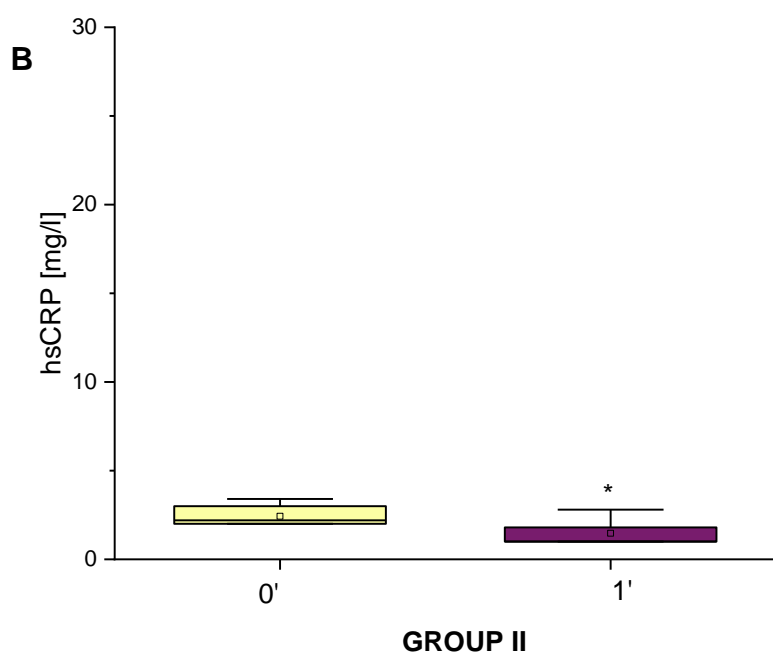

**Supplementary Figure S3, A.** The level of the 2h-PG at points 0' and 1' in group II after the use of manual lymphatic drainage therapy ( $p = 0.050$ ); ♦, patient with a different result **Figure S3, B** the level of the hsCRP at points 0' and 1' ( $p = 0.041$ ). . **Abbreviations:** 0', before therapy; 1', one month after MLD therapy; 2h-PG, 2h-post-load glucose; hsCRP, high-sensitivity C-reactive protein; \* p-value — significant difference ( $p < 0.05$ ).

## Supplementary Figure S4

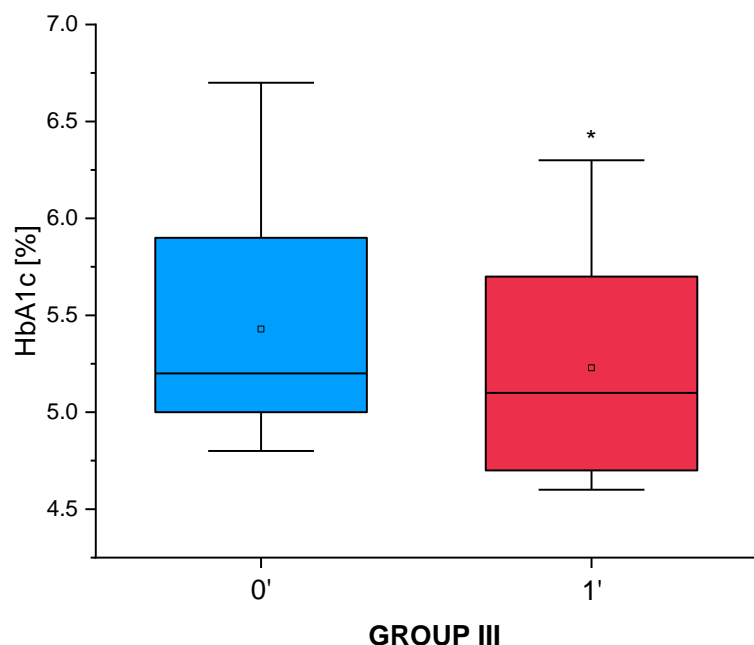

**Supplementary Figure S4.** The level of the HbA1c at points 0' and 1' in group III after the use of manual lymphatic drainage therapy ( $p = 0.013$ ). **Abbreviations:** 0', before therapy; 1', one month after MLD therapy; HbA1c, glycosylated haemoglobin; \* p-value —significant difference ( $p < 0.05$ ).

**Supplementary Table S1:** Average differences in 2h-PG levels in the group I, II and III before and after the use of MLD therapy. The data presented are the mean; \* p-value —significant difference ( $p < 0.05$ ).

| Parameter     | Group I    |    | Group II   |     | Group III  |     |
|---------------|------------|----|------------|-----|------------|-----|
|               | 0'         | 1' | 0'         | 1'  | 0'         | 1'  |
| 2h-PG [mg/dL] | 77         | 76 | 112        | 100 | 99         | 106 |
|               | difference |    | difference |     | difference |     |
|               | -1         |    | -12*       |     | +7         |     |

**Abbreviations:** 0', before therapy; 1', one month after MLD therapy; 2h-PG, 2h-post-load glucose.

**Supplementary table S2:** Average differences in the hsCRP levels in the group I, II and III before and after the use of MLD therapy. The data presented are the mean; \* p-value — significant difference ( $p < 0.05$ ).

| Parameter    | Group I    |    | Group II   |     | Group III  |    |
|--------------|------------|----|------------|-----|------------|----|
|              | 0'         | 1' | 0'         | 1'  | 0'         | 1' |
| hsCRP [mg/L] | 1          | 1  | 5.2        | 2.3 | 2.5        | 4  |
|              | difference |    | difference |     | difference |    |
|              | 0          |    | -2.9*      |     | +1.5       |    |

**Abbreviations:** 0', before therapy; 1', one month after MLD therapy; hsCRP, high-sensitivity C-reactive protein.

**Supplementary table S3:** Average differences in the hsCRP levels in the group I, II and III before and after the use of MLD therapy. The data presented are the mean; \* p-value — significant difference ( $p < 0.05$ ).

| Parameter | Group I    |     | Group II   |     | Group III  |     |
|-----------|------------|-----|------------|-----|------------|-----|
|           | 0'         | 1'  | 0'         | 1'  | 0'         | 1'  |
| HbA1c[%]  | 5.3        | 5.3 | 5.2        | 5.1 | 5.4        | 5.2 |
|           | difference |     | difference |     | difference |     |
|           | 0          |     | 0.1        |     | -0.2*      |     |

**Abbreviations:** 0', before therapy; 1', one month after MLD therapy; HbA1c, glycosylated haemoglobin.
